# Supplementary material for: Listeria monocytogenes ST37 Distribution in Russia and Properties of the Clinical and Food-Born Isolates
Source: Preprints.org preprint supplement (doi:10.20944/preprints202309.1020.v1), 2023-09-14
Supplement: Supplementary file 1 [file supplementary]

Table S2 Virulence factors that differ among ST37 isolates

| Category                           | Source                         | clinical                 |                           |                           |                           |                           |                         | restaurant<br>cooking<br>environment |                          | meat                     |                          |                           |                           | fish                     |                          |                           |
|------------------------------------|--------------------------------|--------------------------|---------------------------|---------------------------|---------------------------|---------------------------|-------------------------|--------------------------------------|--------------------------|--------------------------|--------------------------|---------------------------|---------------------------|--------------------------|--------------------------|---------------------------|
|                                    | Strain                         | GIMC206<br>3:LmcUH<br>21 | GIMC208<br>2:LmcIH<br>1-5 | GIMC209<br>4:LmcH6<br>7_7 | GIMC211<br>2:LmcIH<br>1-8 | GIMC211<br>3:LmcIH<br>1-9 | GIMC213<br>4:LmcEH<br>7 | GIMC202<br>6:LmcBD<br>14             | GIMC202<br>7:LmcBD<br>15 | GIMC205<br>4:Lmc688<br>8 | GIMC207<br>1:Lmc986<br>4 | GIMC210<br>6:Lmc107<br>04 | GIMC210<br>7:Lmc113<br>63 | GIMC205<br>3:Lmc664<br>6 | GIMC210<br>3:Lmc694<br>2 | GIMC210<br>5:Lmc102<br>58 |
|                                    | Locus/Allele                   |                          |                           |                           |                           |                           |                         |                                      |                          |                          |                          |                           |                           |                          |                          |                           |
| adhesion                           | ami (lmo2558) autolysin<br>Ami | 13                       | 13                        | 13                        | 13                        | 13                        | SNV of<br>197           | SNV of<br>13                         | SNV of<br>13             | 13                       | 13                       | 13                        | 13                        | 13                       | 13                       | 13                        |
|                                    | lap (lmo1634)                  | 10                       | 10                        | 10                        | 10                        | 10                        | 10                      | 10                                   | 10                       | 10                       | 10                       | 10                        | 10                        | 10                       | SNV of<br>10             | SNV of<br>10              |
|                                    | lapB (lmo1666)                 | 10                       | 10                        | 10                        | 592<br>(SNV of<br>10)     | 592<br>(SNV of<br>10)     | 10                      | 10                                   | 10                       | 10                       | 10                       | 10                        | 10                        | 10                       | 10                       | 10                        |
| intracellular survival             | purQ (lmo1769)                 | 12                       | 12                        | SNV of<br>12              | 12                        | 12                        | 12                      | 12                                   | 12                       | 12                       | 12                       | 12                        | 12                        | 12                       | 12                       | 12                        |
| peptidoglycan<br>modification      | pdgA (lmo0415)                 | 7                        | 7                         | SNV of<br>7               | 7                         | 7                         | 7                       | 7                                    | 7                        | 7                        | 7                        | 7                         | 7                         | 7                        | 7                        | 7                         |
| biofilm formation and<br>virulence | comK (LMOF2365_2303)           | pseudo<br>gene           | 16                        | 16                        | 16                        | 16                        | 16                      | 16                                   | 16                       | 16                       | 16                       | 16                        | pseudo<br>gene            | 16                       | 16                       | 16                        |
| teichoic acid<br>biosynthesis      | gtcA (lmo2549)                 | 1                        | 1                         | 1                         | 77 (SNV<br>of 1)          | 77 (SNV<br>of 1)          | 1                       | 1                                    | 1                        | 1                        | 1                        | 1                         | 1                         | 1                        | 1                        | 1                         |
| internalins                        | inlK (lmo1290)                 | 1                        | 1                         | 1                         | 1                         | 1                         | 1                       | SNV of<br>1                          | SNV of<br>1              | 1                        | SNV of<br>1              | 1                         | 1                         | 1                        | 1                        | 1                         |
| LIPI-1                             | plcA (lmo0201)                 | 11                       | 11                        | 11                        | 11                        | 11                        | 11                      | 11                                   | 11                       | SNV of<br>11             | 11                       | 11                        | 11                        | 11                       | 11                       | 11                        |
| global transcription<br>factor     | lmo1280 (codY)                 | 17                       | 17                        | 17                        | 17                        | 17                        | 17                      | 17                                   | 17                       | 17                       | 17                       | 17                        | 17                        | 59 (SNV<br>of 17)        | 17                       | 17                        |
