# Supplementary material for: Listeria monocytogenes ST37 Distribution in Russia and Properties of the Clinical and Food-Born Isolates
Source: Preprints.org preprint supplement (doi:10.20944/preprints202309.1020.v1), 2023-09-14
Supplement: Supplementary file 2 [file supplementary]

Table S3 Alleles of the resistance genes

| Category                                                           | Source         | clinical             |                      |                       |                      |                      |                      | restaurant<br>cooking<br>environment |                      | meat                 |                      |                       |                       | fish                 |                      |                       |
|--------------------------------------------------------------------|----------------|----------------------|----------------------|-----------------------|----------------------|----------------------|----------------------|--------------------------------------|----------------------|----------------------|----------------------|-----------------------|-----------------------|----------------------|----------------------|-----------------------|
|                                                                    | Strain         | GIMC2063:Lm<br>cUH21 | GIMC2082:Lm<br>dH1-5 | GIMC2094:Lm<br>dH67_7 | GIMC2112:Lm<br>dH1-8 | GIMC2113:Lm<br>dH1-9 | GIMC2134:Lm<br>cEH-7 | GIMC2026:Lm<br>cBD14                 | GIMC2027:Lm<br>cBD15 | GIMC2054:Lm<br>c6888 | GIMC2071:Lm<br>c9864 | GIMC2106:Lm<br>c10704 | GIMC2107:Lm<br>c11363 | GIMC2053:Lm<br>c6646 | GIMC2103:Lm<br>c6942 | GIMC2105:Lm<br>c10258 |
|                                                                    | Locus/Allele   |                      |                      |                       |                      |                      |                      |                                      |                      |                      |                      |                       |                       |                      |                      |                       |
| Fosfomycin resistance genes                                        | fosX (lmo1702) | 4                    | 4                    | 4                     | 4                    | 4                    | 4                    | 4                                    | 4                    | 4                    | 4                    | 4                     | 4                     | SNV of 4             | 4                    | 4                     |
| lincosamide                                                        | lmo0919 (lin)  | 33                   | 33                   | 33                    | 33                   | 33                   | 33                   | 33                                   | 33                   | 33                   | 33                   | 33                    | 33                    | 33                   | 33                   | 33                    |
| resistance mechanism<br>against cationic<br>antimicrobial peptides | lmo1695 (mprF) | 7                    | 7                    | 7                     | 7                    | 7                    | 7                    | 7                                    | 7                    | 7                    | 7                    | 7                     | 7                     | 7                    | 7                    | 7                     |
| Quinolon resistance                                                | parC (lmo1287) | 27                   | 27                   | 27                    | 27                   | 27                   | 27                   | 27                                   | 27                   | 27                   | 27                   | 27                    | 27                    | 27                   | 27                   | 27                    |
|                                                                    | norB (lmo2818) | 8                    | 8                    | 8                     | 8                    | 8                    | 8                    | 8                                    | 8                    | 31 (SNV of 8)        | 8                    | 8                     | 8                     | 8                    | 8                    | 8                     |
