# Supplementary material for: Listeria monocytogenes ST37 Distribution in Russia and Properties of the Clinical and Food-Born Isolates
Source: Preprints.org preprint supplement (doi:10.20944/preprints202309.1020.v1), 2023-09-14
Supplement: Supplementary file 3 [file supplementary]

Table S1 The differences in the core genomes of ST37 isolates

|                   | GIMC2063:LmcUH21 | GIMC2082:LmcIH1-5 | GIMC2094:LmcH67_7 | GIMC2123:LmcUH37 | GIMC2134:LmcEH-7 | GIMC2112:LmcIH1-8 | GIMC2113:LmcIH1-9 | GIMC2106:Lmc10704 | GIMC2107:Lmc11363 | GIMC2054:Lmc6888 | GIMC2071:Lmc9864 | GIMC2026:LmcBD14 | GIMC2027:LmcBD15 | GIMC2053:Lmc6646 | GIMC2103:Lmc6942 | GIMC2105:Lmc10258 |
|-------------------|------------------|-------------------|-------------------|------------------|------------------|-------------------|-------------------|-------------------|-------------------|------------------|------------------|------------------|------------------|------------------|------------------|-------------------|
| GIMC2063:LmcUH21  | 0                | 34                | 37                | 30               | 32               | 74                | 74                | 37                | 35                | 34               | 35               | 37               | 38               | 35               | 33               | 32                |
| GIMC2082:LmcIH1-5 | 34               | 0                 | 23                | 18               | 18               | 80                | 80                | 24                | 24                | 26               | 21               | 24               | 25               | 27               | 25               | 24                |
| GIMC2094:LmcH67_7 | 37               | 23                | 0                 | 21               | 21               | 84                | 84                | 27                | 27                | 29               | 24               | 27               | 28               | 30               | 28               | 27                |
| GIMC2123:LmcUH37  | 30               | 18                | 21                | 0                | 16               | 76                | 76                | 22                | 20                | 22               | 19               | 22               | 23               | 23               | 21               | 20                |
| GIMC2134:LmcEH-7  | 32               | 18                | 21                | 16               | 0                | 78                | 78                | 20                | 22                | 24               | 16               | 22               | 23               | 25               | 23               | 22                |
| GIMC2112:LmcIH1-8 | 74               | 80                | 84                | 76               | 78               | 0                 | 0                 | 84                | 83                | 81               | 80               | 85               | 86               | 80               | 78               | 77                |
| GIMC2113:LmcIH1-9 | 74               | 80                | 84                | 76               | 78               | 0                 | 0                 | 84                | 83                | 81               | 80               | 85               | 86               | 80               | 78               | 77                |
| GIMC2106:Lmc10704 | 37               | 24                | 27                | 22               | 20               | 84                | 84                | 0                 | 28                | 30               | 23               | 28               | 29               | 31               | 29               | 28                |
| GIMC2107:Lmc11363 | 35               | 24                | 27                | 20               | 22               | 83                | 83                | 28                | 0                 | 28               | 25               | 28               | 29               | 29               | 27               | 26                |
| GIMC2054:Lmc6888  | 34               | 26                | 29                | 22               | 24               | 81                | 81                | 30                | 28                | 0                | 27               | 29               | 30               | 25               | 23               | 22                |
| GIMC2071:Lmc9864  | 35               | 21                | 24                | 19               | 16               | 80                | 80                | 23                | 25                | 27               | 0                | 25               | 26               | 28               | 26               | 25                |
| GIMC2026:LmcBD14  | 37               | 24                | 27                | 22               | 22               | 85                | 85                | 28                | 28                | 29               | 25               | 0                | 1                | 31               | 29               | 28                |
| GIMC2027:LmcBD15  | 38               | 25                | 28                | 23               | 23               | 86                | 86                | 29                | 29                | 30               | 26               | 1                | 0                | 32               | 30               | 29                |
| GIMC2053:Lmc6646  | 35               | 27                | 30                | 23               | 25               | 80                | 80                | 31                | 29                | 25               | 28               | 31               | 32               | 0                | 12               | 11                |
| GIMC2103:Lmc6942  | 33               | 25                | 28                | 21               | 23               | 78                | 78                | 29                | 27                | 23               | 26               | 21               | 30               | 12               | 0                | 1                 |
| GIMC2105:Lmc10258 | 32               | 24                | 27                | 20               | 22               | 77                | 77                | 28                | 26                | 22               | 25               | 20               | 29               | 11               | 1                | 0                 |

|  |                                 |
|--|---------------------------------|
|  | clinical isolates               |
|  | meet isolates                   |
|  | restaurant cooking environments |
|  | fish isolates                   |
